# Supplementary material
Source: PubMed Central journal article supplement (PMC2670122)
Supplement: M809268200_1.pdf [file M809268200_1.pdf]

## SUPPLEMENTAL EXPERIMENTAL PROCEDURES

**Luciferase Assays-** Cells were seeded on 24-well plates and grown to 70% confluency. Cells were then transfected with 100 ng of reporter constructs and 10 ng of the renilla luciferase internal control plasmid pRL-SV40 using Lipofectamine2000 transfection protocol. Twenty-four hours after transfection, cells were treated with 5  $\mu$ M SAHA or 200 nM LAQ for additional 12 hours. Cells were then lysed and subjected to Dual-Luciferase assay as per the manufacturer's recommendations (Promega).

## SUPPLEMENTARY FIGURE LEGENDS

**Fig. S1.** HDACi have no effect on p53<sup>L22Q/W23S</sup> transactivation. p53<sup>-/-</sup>, p53<sup>WT</sup> or p53<sup>L22Q/W23S</sup> HCT116 cells were transiently co-transfected with the indicated firefly luciferase reporter constructs containing p21 or mdm2 promoter together with pRL-SV40 renilla luciferase vector. Cells were treated with DMSO, SAHA or LAQ and subjected to Dual-Luciferase assay. The results are represented as the mean ratio of firefly/renilla luciferase activities  $\pm$  SD, n=3.

**Fig. S2.** Cell death and p53 expression in response to HDACi. (A) HCT116 wild type (p53<sup>+/+</sup>) and p53<sup>-/-</sup> cells stably transfected with empty vector (Puro or Bsd), p53<sup>WT</sup> or p53<sup>L22Q/W23S</sup> were treated with either 5  $\mu$ M SAHA or 200 nM LAQ for the indicated periods of time. The percentage of cell viability was determined by trypan blue dye exclusion assay. (B) The same cell lines treated as above for 18 hours were subjected to immunoblot analysis.

**Fig. S3.** Knockdown of mutant p53 reduces HDACi-induced apoptosis. (A) HT-29 cells infected with either scrambled control (shScr) or p53 targeting shRNA (shp53) lentivirus were treated with 5  $\mu$ M SAHA or 200 nM LAQ for 36 hours and subjected to immunoblot and caspase-3 activity assay. (B, C) SW480 and HT-29 cells infected with shScr or shp53 lentivirus were treated with 5  $\mu$ M SAHA or 200 nM LAQ for the indicated times, and cell viability was determined by trypan blue exclusion assay. (D) SW480 cells infected with shScr or shp53 lentivirus were treated with DMSO or 200 nM LAQ for 24 hours and subjected to Annexin V-APC/7AAD staining.

**Fig. S4.** SirT1 does not affect LAQ824-induced p53-dependent apoptosis. (A, B) H1299 p53<sup>-/-</sup> and p53<sup>D281G</sup> cells were transfected with empty pcDNA3.1 or pcDNA3.1-SirT1 expression vectors and then treated with DMSO or 200 nM LAQ for 24 hours and subjected to immunoblot and caspase-3 assays. (C, D) H1299 p53<sup>-/-</sup> and p53<sup>D281G</sup> cells were treated with DMSO, 1  $\mu$ M EX527, 200 nM LAQ or the combination of 1  $\mu$ M EX527 and 200 nM LAQ for 24 hours and subjected to western blot and AnnexinV-APC/7AAD staining.

**Fig. S5.** HCT116 p53<sup>-/-</sup> cells stably expressing TAP or TAP-p53<sup>L22Q/W23S</sup> were treated with 200 nM LAQ for the indicated periods of time. The percentage of cell viability was determined by trypan blue dye exclusion assay.

**Fig. S6.** H1299 p53<sup>-/-</sup> and p53<sup>D281G</sup> cells were infected with shScr or shKu70 lentivirus for 24 hours, treated with DMSO or 200 nM LAQ for 24 hours, and subjected to immunoblot analysis.

**Fig. S7.** Acetylation of p53 is required for Bax translocation but not for p53 binding to Bcl-XL. (A) HCT116 p53<sup>-/-</sup> cells stably expressing control Puro or p53<sup>L22Q/W23S</sup> were treated with DMSO, 5  $\mu$ M SAHA or 200 nM LAQ for 18 hours and subjected to subcellular fractionation and immunoblot analysis. (B) HCT116 p53<sup>-/-</sup> cells stably transfected with empty (Puro), Myc-p53<sup>L22Q/W23S</sup> or Myc-p53<sup>L22Q/W23S-3KR</sup> were treated with DMSO, 5  $\mu$ M SAHA or 200 nM LAQ for 16 hours and subjected to subcellular fractionation and immunoblot analysis. (C, D) HCT116 p53<sup>-/-</sup> cells were transiently transfected with Bcl-XL and the indicated Myc-tagged p53 expression plasmids or empty control vector for 36 hours, treated with or

without 200 nM LAQ for additional 12 hours, and subjected to immunoprecipitation in CHAPS lysis buffer with anti-Myc monoclonal antibody, followed by immunoblot analysis with the indicated antibodies.

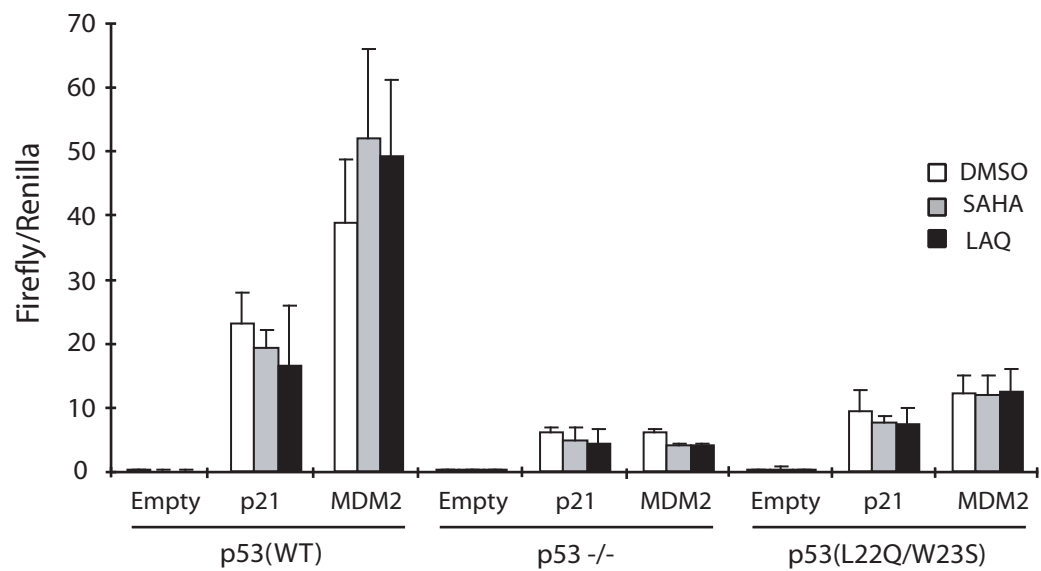

Figure S1

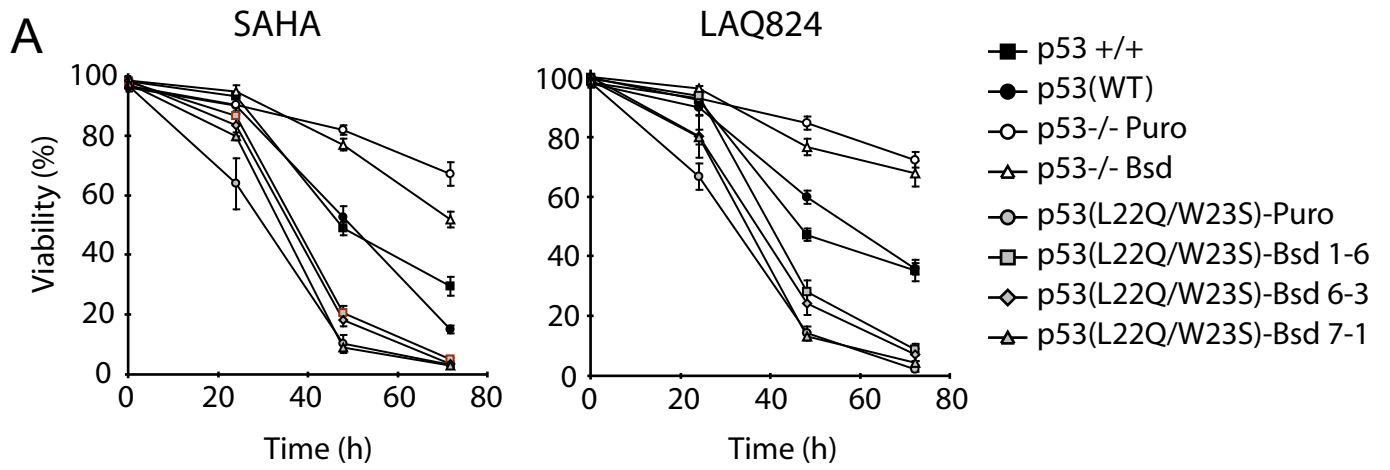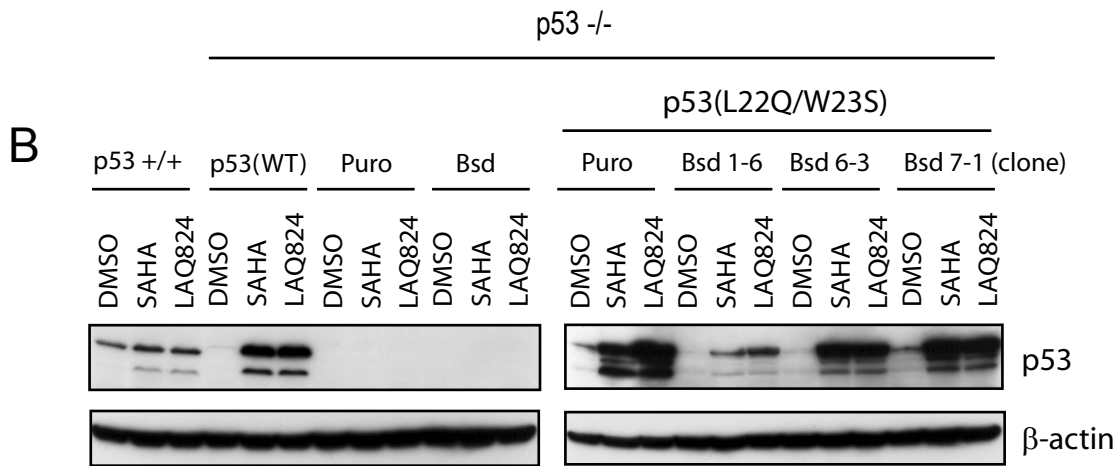

Figure S2

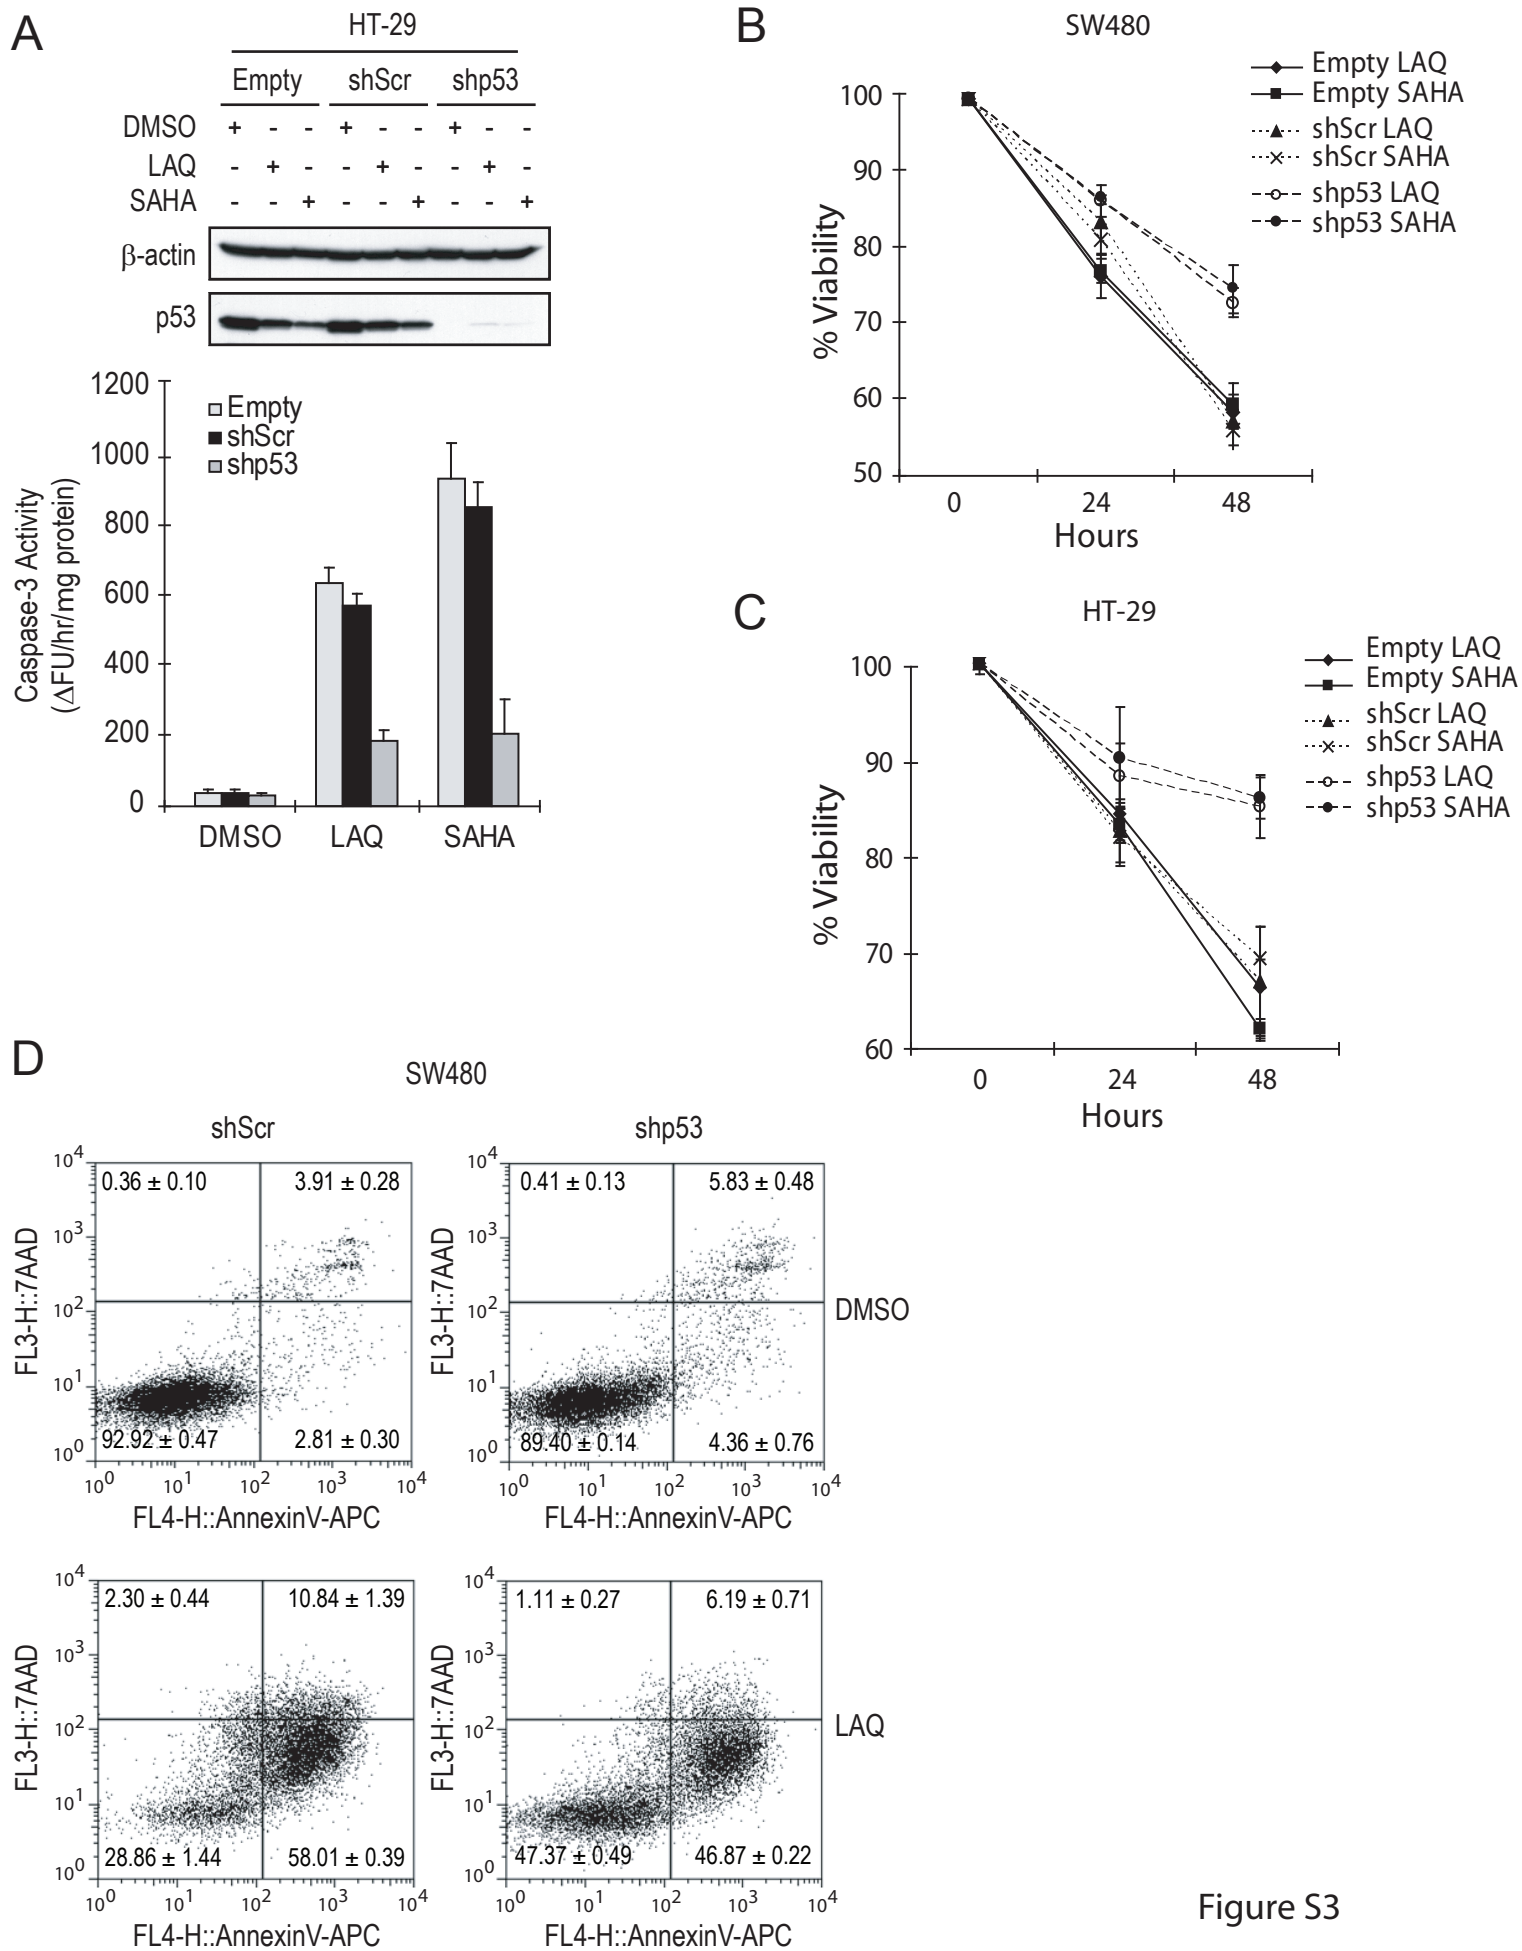

Figure S3

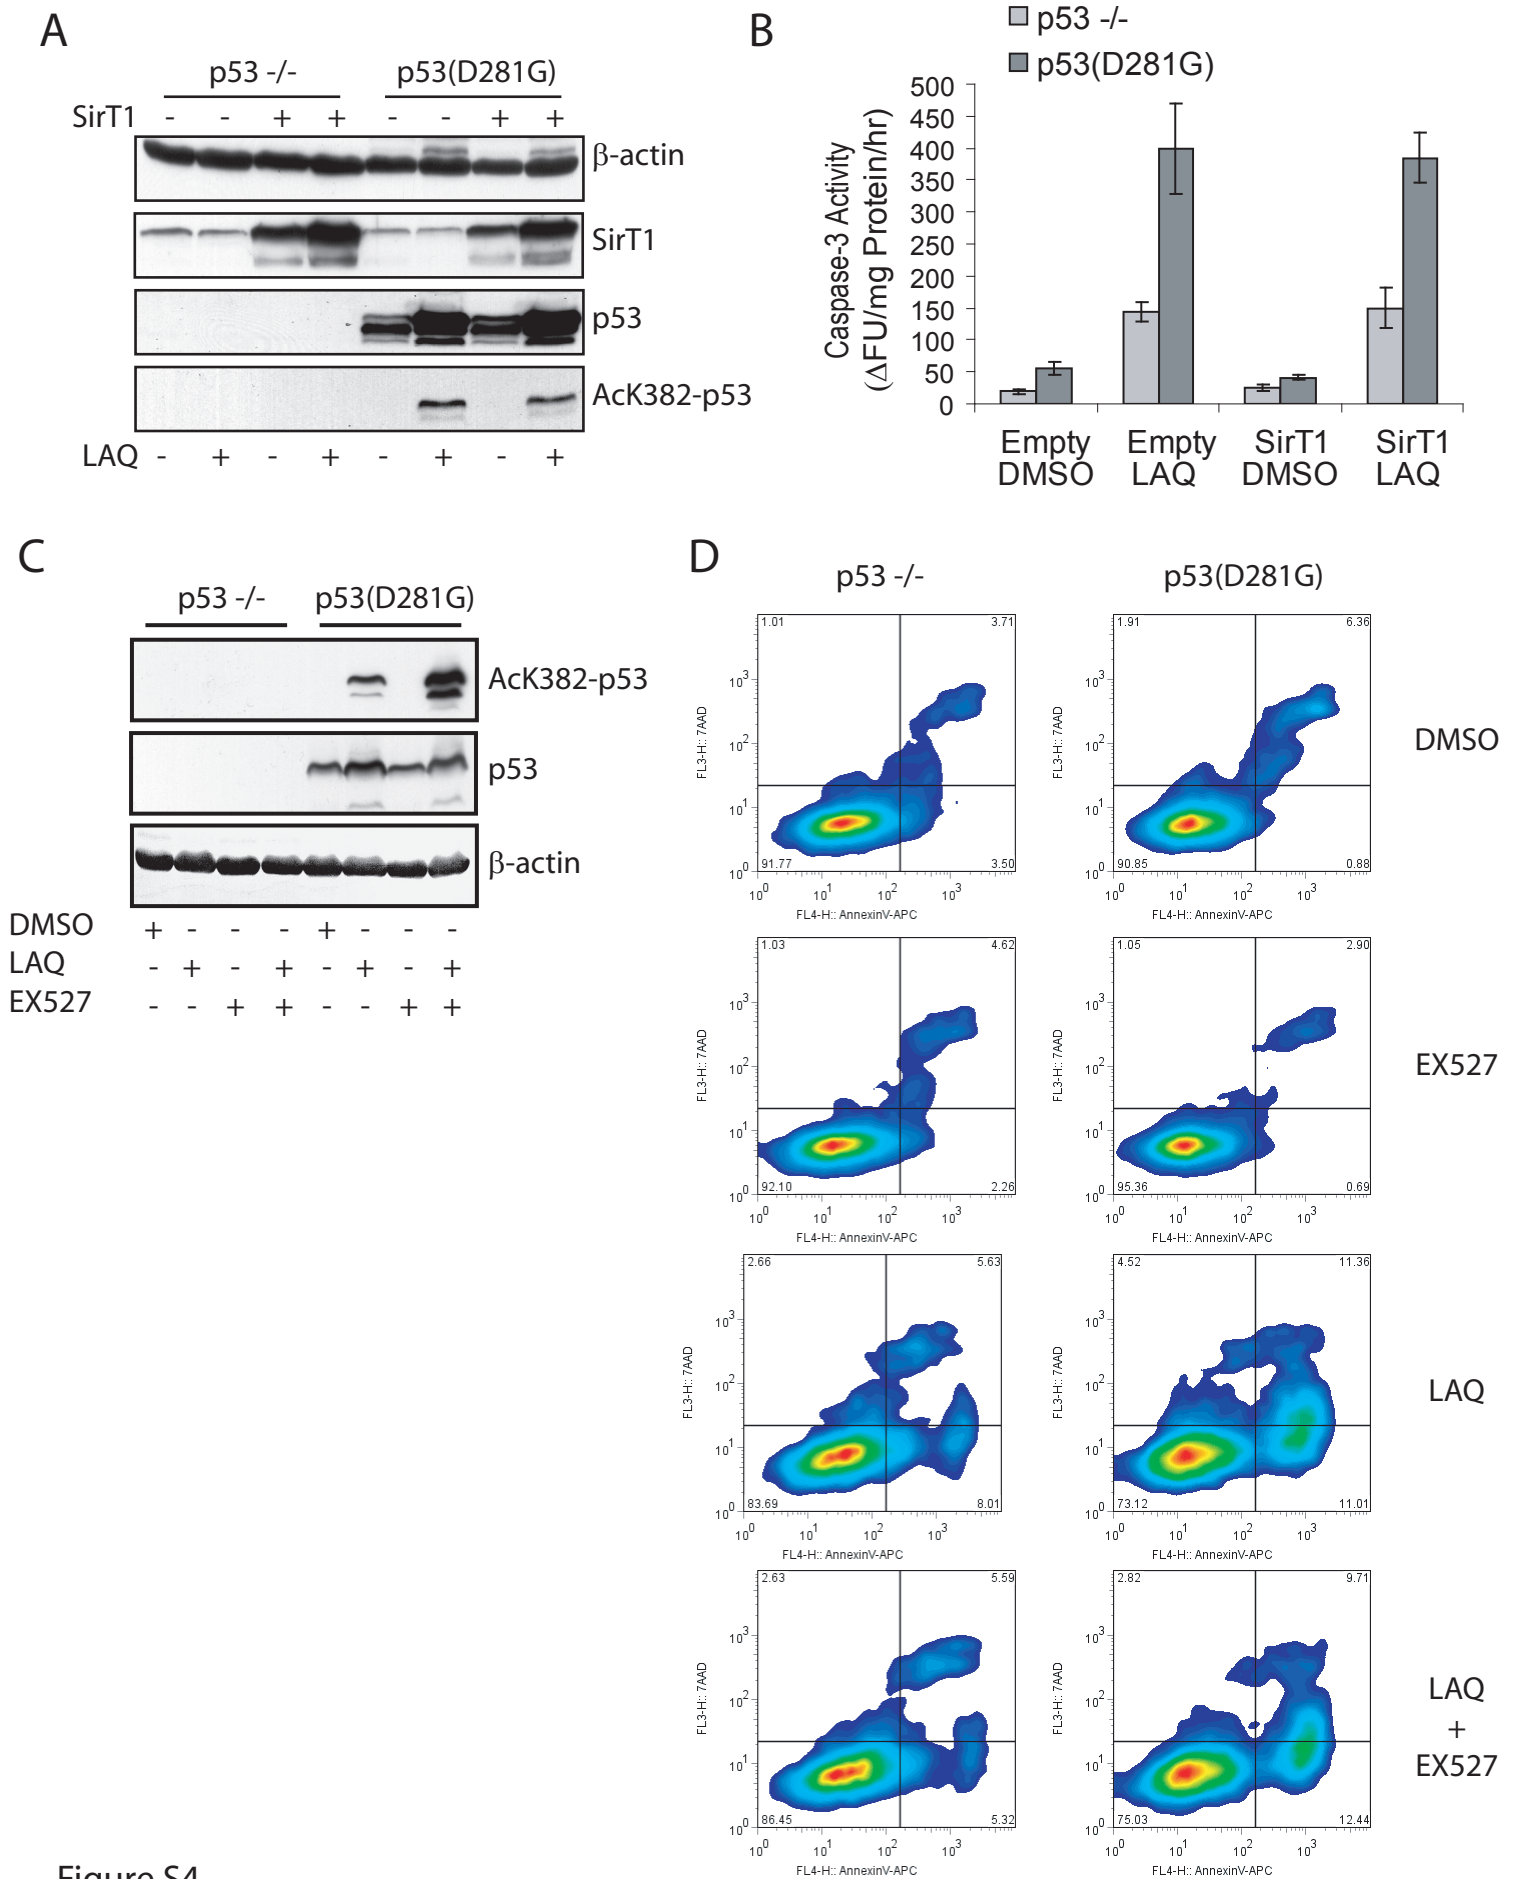

Figure S4

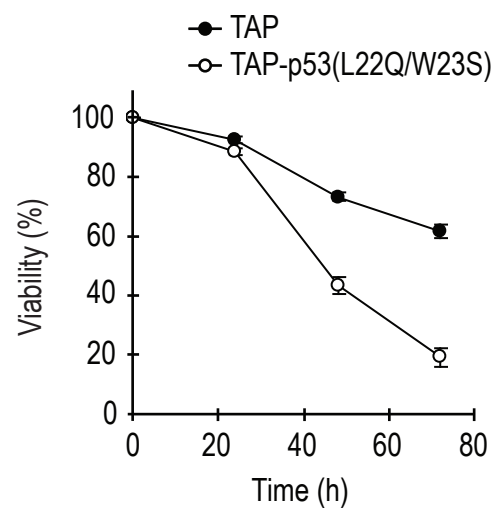

Figure S5

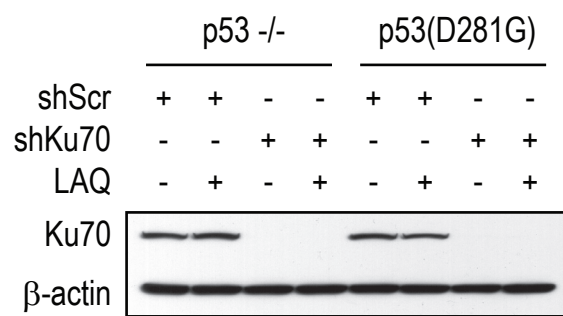

Figure S6



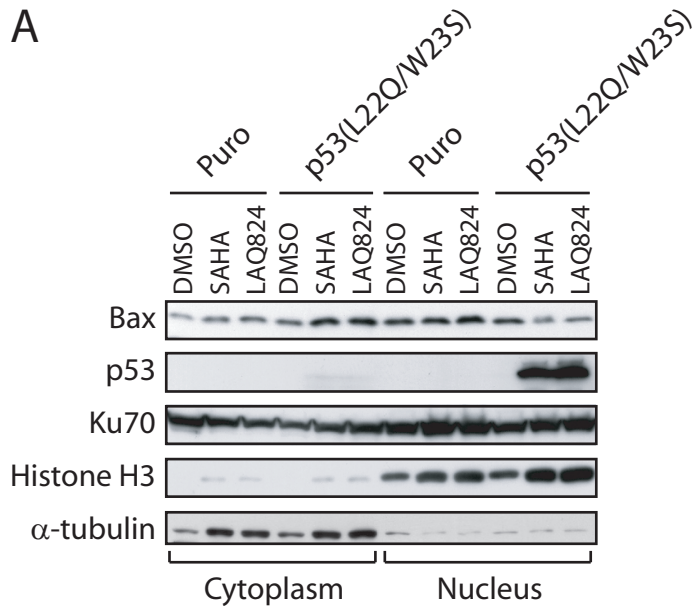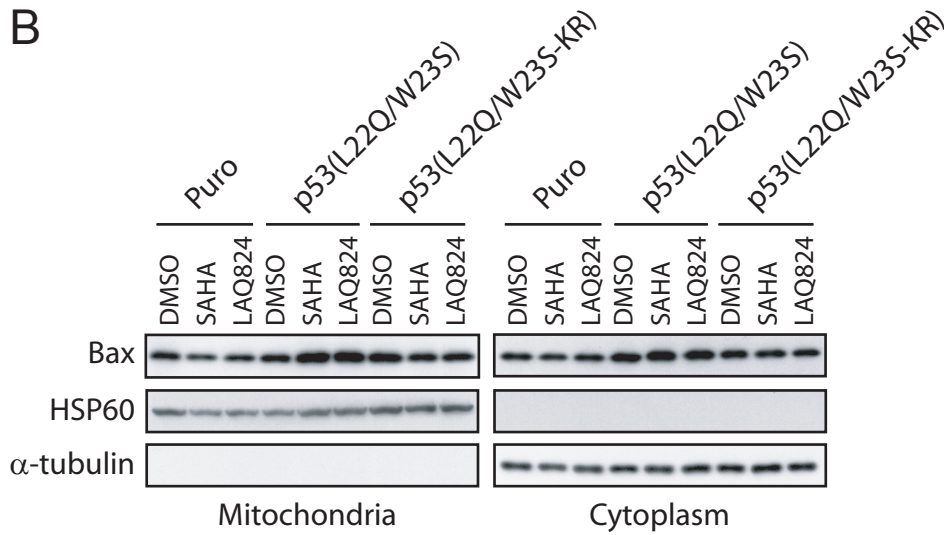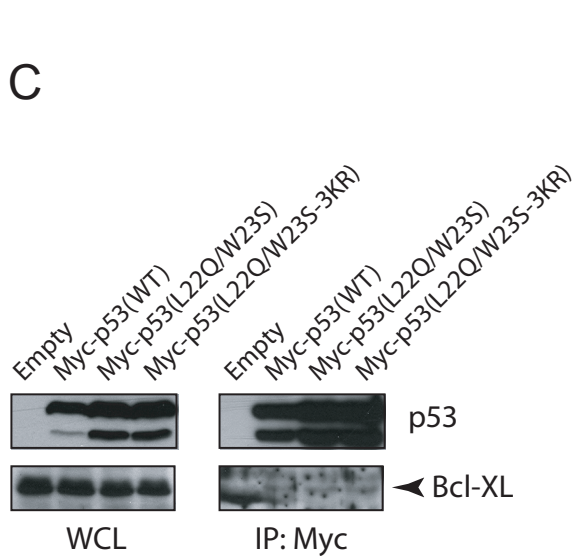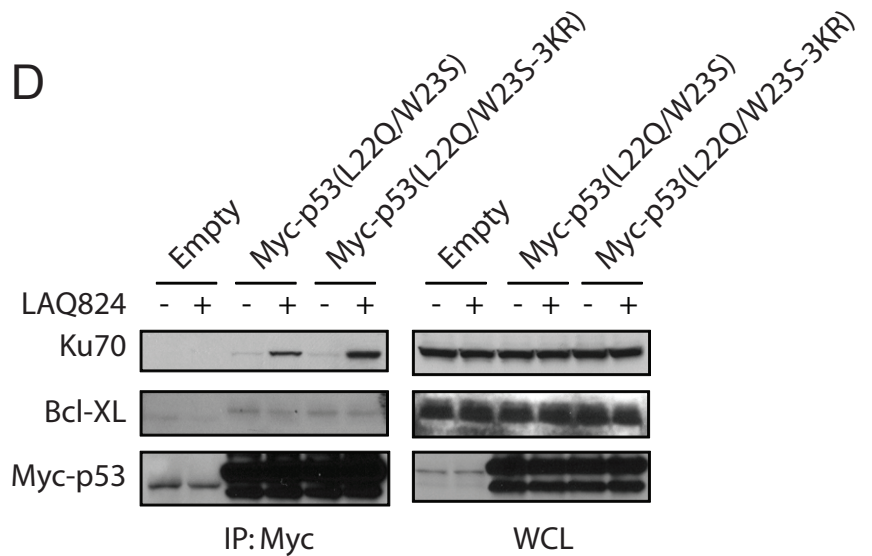

Figure S7
